# Supplementary material for: ABO antigen and secretor statuses are not associated with gut microbiota composition in 1,500 twins
Source: PubMed Central journal article supplement (PMC5117602; doi:10.1186/s12864-016-3290-1), 2016-11-21

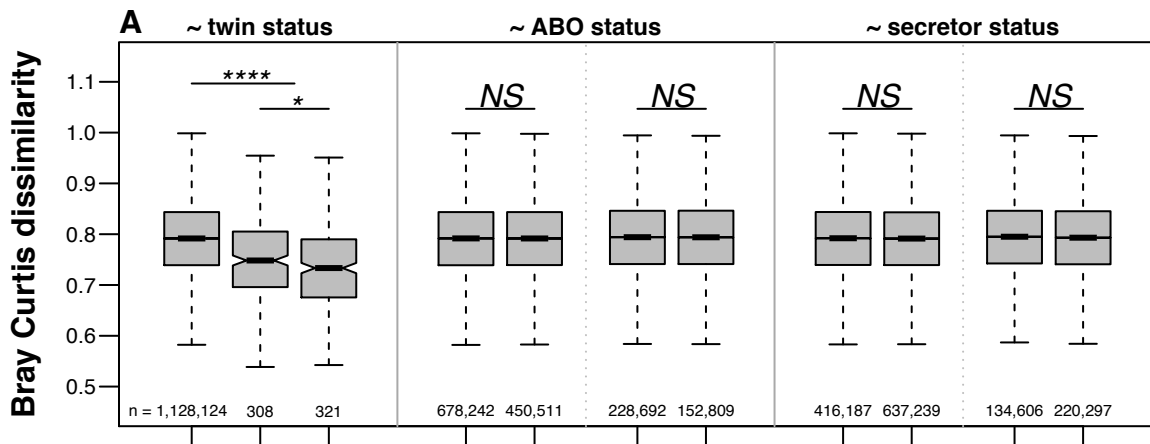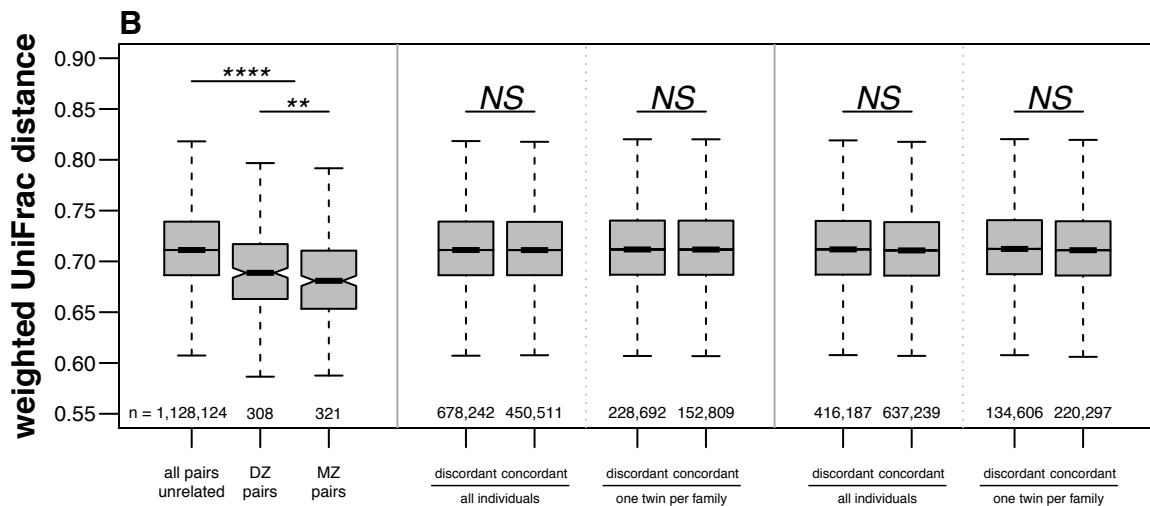

Supplement: 12864_2016_3290_MOESM7_ESM.pdf [file 12864_2016_3290_MOESM7_ESM.pdf]
